# Supplementary material for: Vertically aligned 1T-phase PtSe2 on flexible carbon cloth for efficient and stable hydrogen evolution reaction
Source: Royal Society of Chemistry journal article supplement (doi:10.1039/d1tc01552d), 2021-01-01
Supplement: d1tc01552d1.pdf [file d1tc01552d1.pdf]

Supporting Information

**Vertically Aligned 1T-phase PtSe<sub>2</sub> on Flexible Carbon Cloth for Efficient and Stable Hydrogen Evolution Reaction**

Limin Zhang,<sup>1</sup> Dezhi Kong,<sup>1</sup> Qianqian Zhuang,<sup>2</sup> Minglang Wang,<sup>3</sup> Taiyi Zhang,<sup>2</sup>  
Jinhao Zang,<sup>1</sup> Weixia Shen,<sup>1</sup> Tingting Xu,<sup>1\*</sup> Di Wu,<sup>1</sup> Yongtao Tian,<sup>1</sup> Ye Wang,<sup>1</sup>  
Xinjian Li,<sup>1</sup> Xiaowen Huang<sup>2\*</sup>

1. Key Laboratory of Material Physics, Ministry of Education, School of Physics and Microelectronics, Zhengzhou University, Zhengzhou 450001, China.
2. State Key Laboratory of Biobased Material and Green Papermaking; Department of Bioengineering, Qilu University of Technology (Shandong Academy of Sciences), Jinan 250353, China.
3. Shandong Key Laboratory of Medical Physics and Image Processing & Shandong Provincial Engineering and Technical Center of Light Manipulations, School of Physics and Electronics, Shandong Normal University, Jinan 250358, China.

\*Corresponding author. E-mail address: xutt@zzu.edu.cn;  
huangxiaowen2013@gmail.com

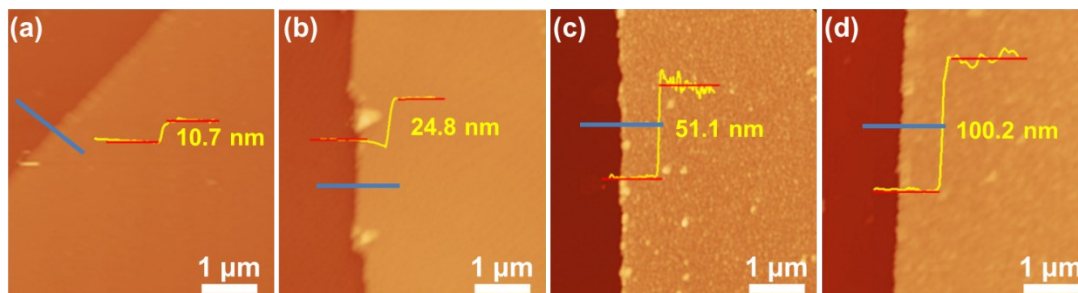

**Fig. S1** AFM images and corresponding height profiles for PtSe<sub>2</sub> samples on Si substrate, and the growing procedures of them are same with that of (a) PtSe<sub>2</sub>-1, (b) PtSe<sub>2</sub>-2, (c) PtSe<sub>2</sub>-3 and (d) PtSe<sub>2</sub>-4, respectively.

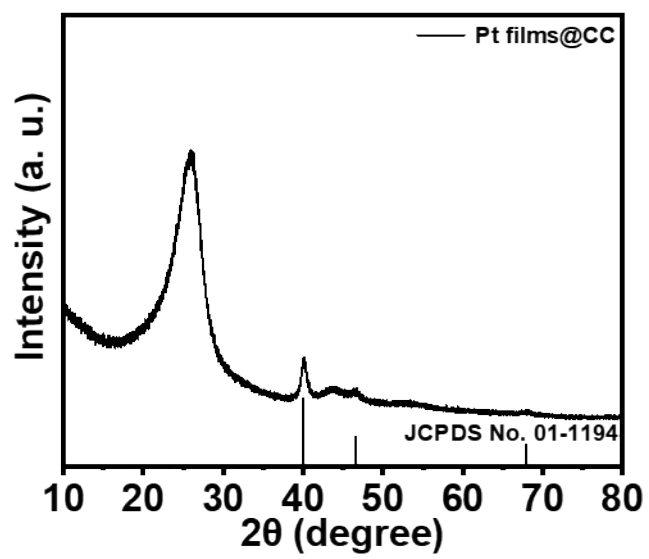

**Fig. S2** XRD characterization of Pt films sputtered on the substrate of bare CC.

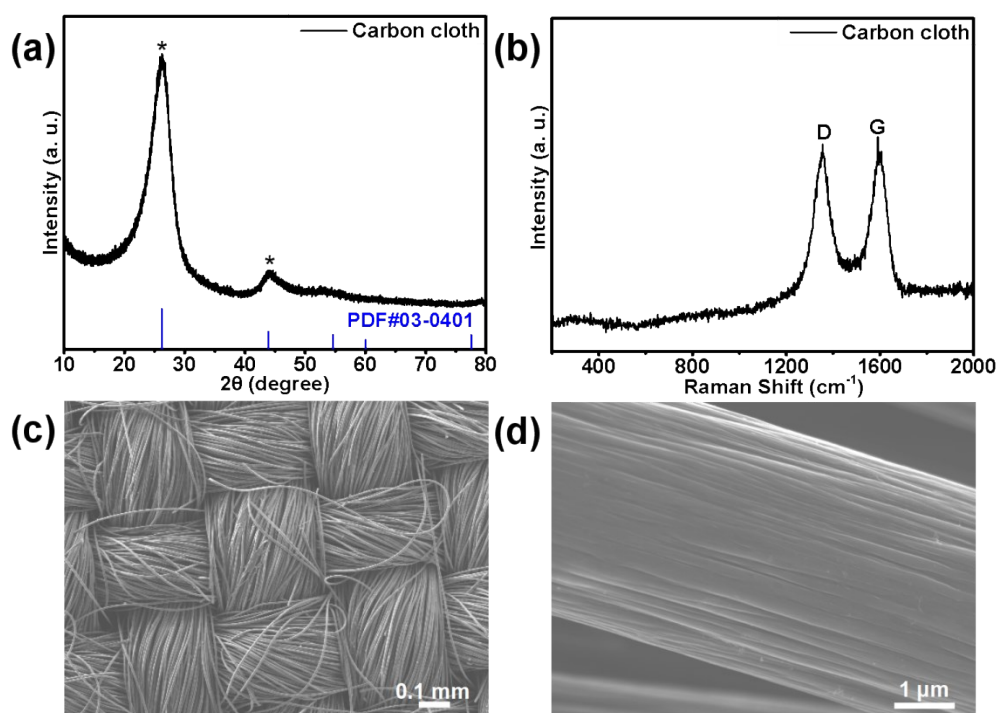

**Fig. S3** (a) XRD patterns and (b) Raman spectra of the bare carbon cloth; (c, d) SEM images of the bare carbon cloth at different magnifications used for the fabrication of functional electrodes.

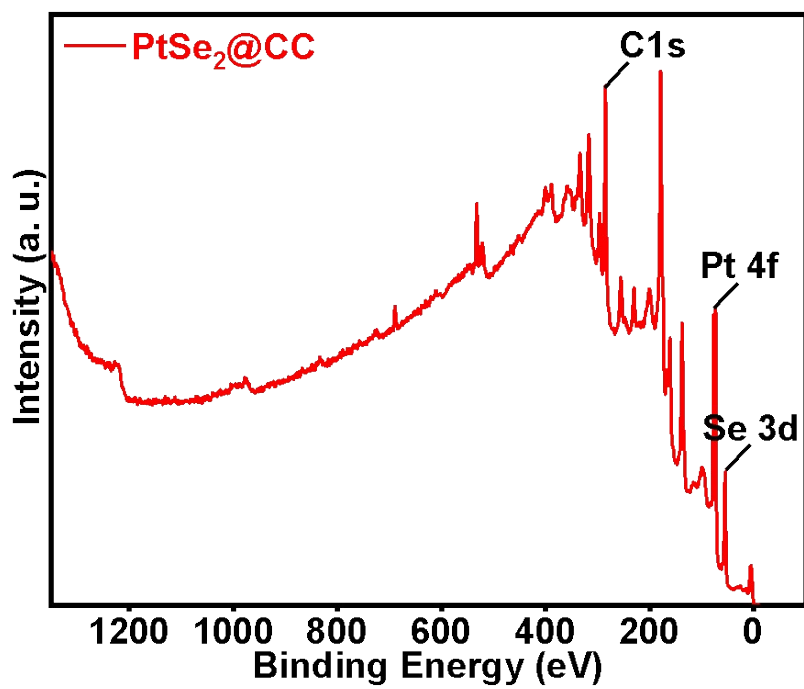

**Fig. S4** Wide-scan XPS spectrum of PtSe<sub>2</sub>@CC.

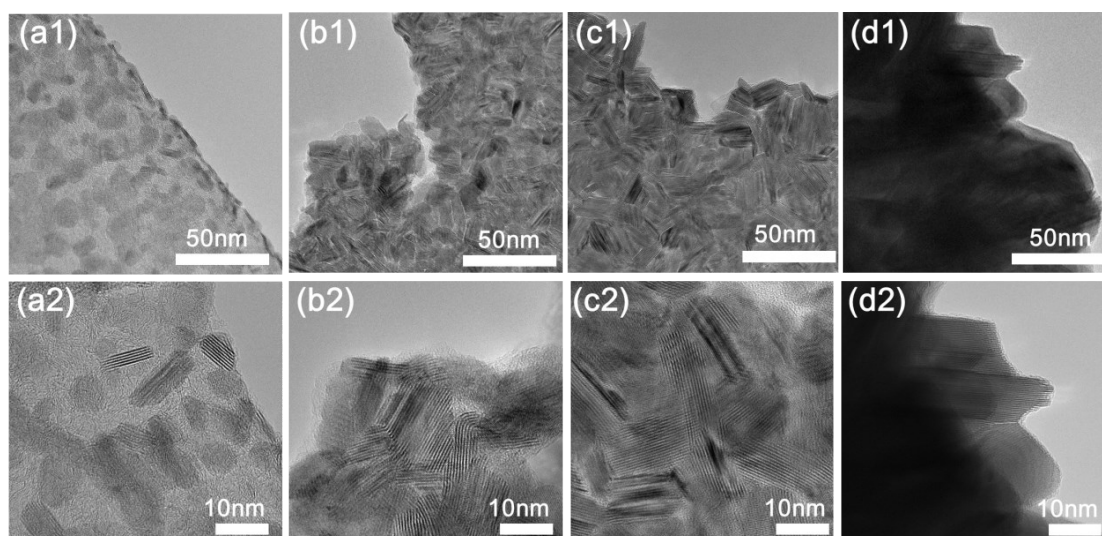

**Fig. S5** (a1-a2), (b1-b2), (c1-c2) and (d1-d2) are the low and high-resolution images of PtSe<sub>2</sub> samples (PtSe<sub>2</sub>@CC-1, PtSe<sub>2</sub>@CC-2, PtSe<sub>2</sub>@CC-3 and PtSe<sub>2</sub>@CC-4, respectively.)

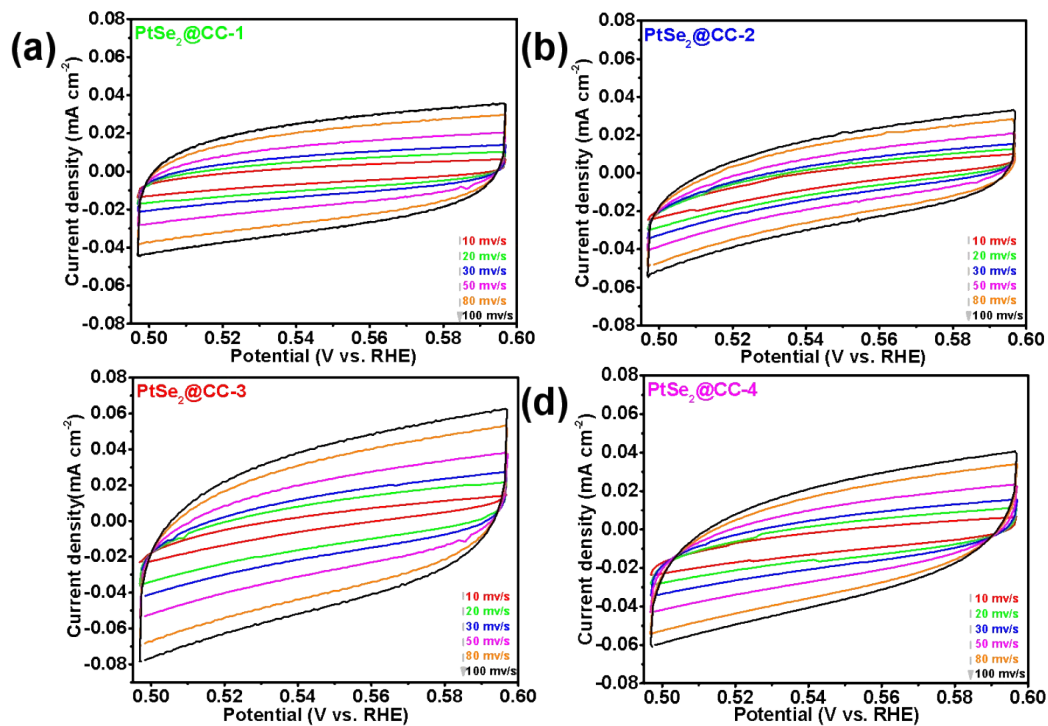

**Fig. S6** Electrochemical cyclic voltammetry curves of as-grown PtSe<sub>2</sub>@CC samples with different PtSe<sub>2</sub> thickness. (a) PtSe<sub>2</sub>@CC-1, ~10.7 nm; (b) PtSe<sub>2</sub>@CC-2, ~24.8 nm; (c) PtSe<sub>2</sub>@CC-3, ~51.1 nm and (d) PtSe<sub>2</sub>@CC-4, ~100.2 nm. The scan rates are in the ranges from 10 mV/s to 100 mV/s.

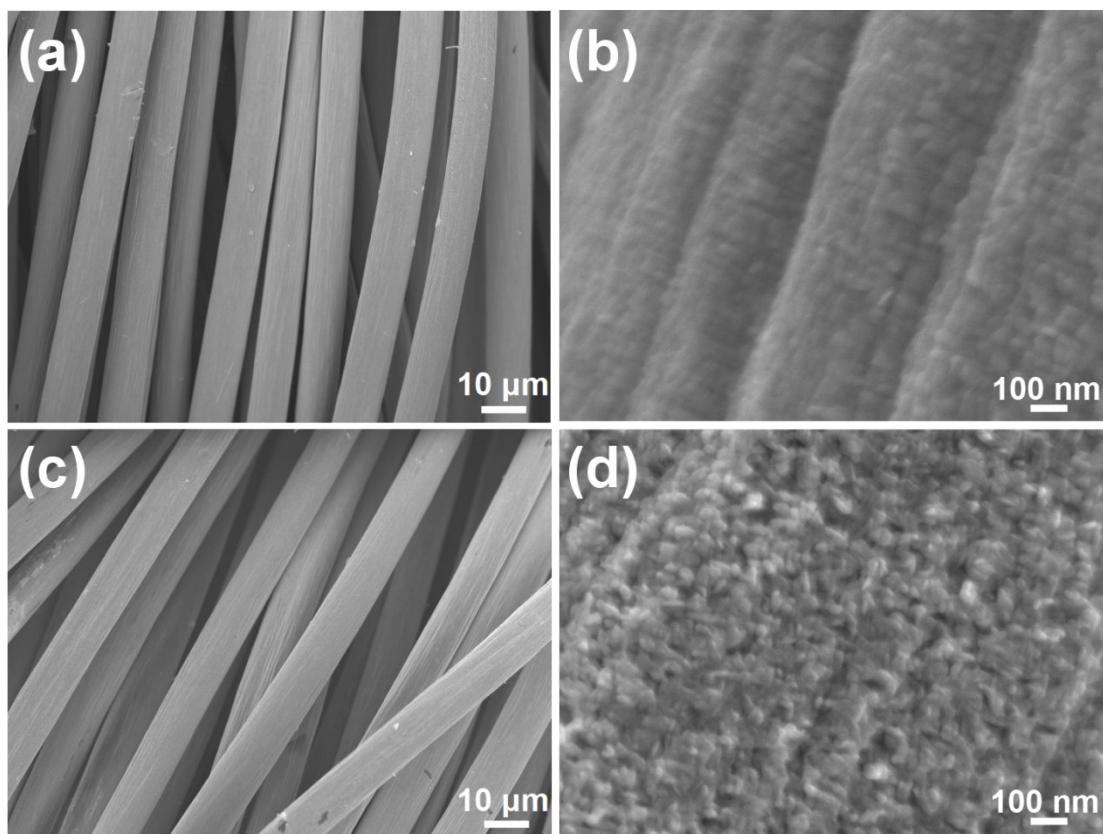

**Fig. S7** The SEM results for conducting chronoamperometry measurement for 30 h of PtSe<sub>2</sub>@CC-3. the morphology of PtSe<sub>2</sub>@CC-3 was characterized before (a)-(b) and (c)-(d) after 30 h.



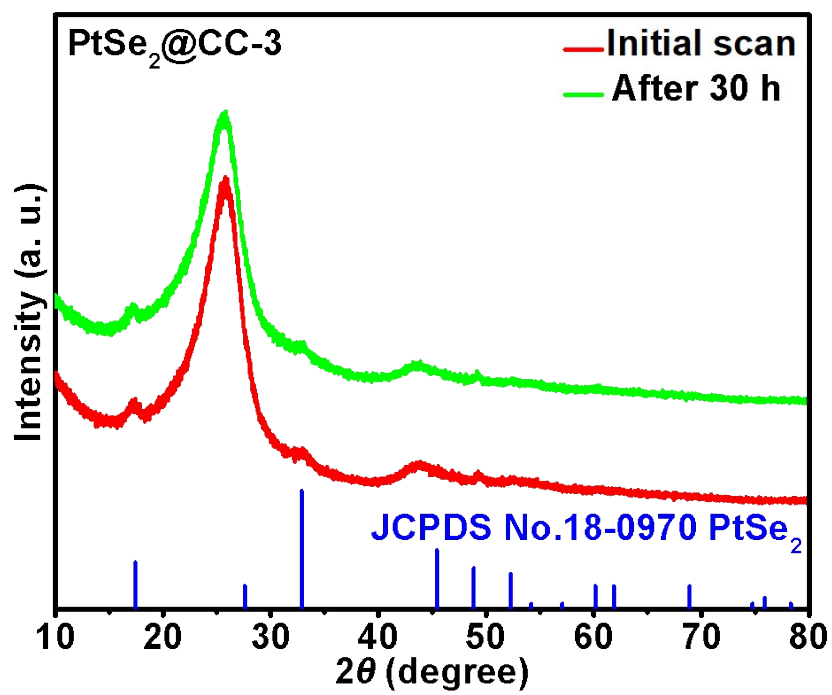

**Fig. S8** The XRD results that conducted chronoamperometry measurement before and after 30 h of PtSe<sub>2</sub>@CC-3.

**Table S1** Comparisons of HER performances of TMDCs-based catalysts on the various flexible carbon substrate, such as carbon fiber (CF), carbon cloth (CC) and carbon fiber paper (CFP).

| catalyst                          | Substrate | $\eta_{10}$ (mV) | Tafel slope (mV dec <sup>-1</sup> ) | Method       | Ref.             |
|-----------------------------------|-----------|------------------|-------------------------------------|--------------|------------------|
| WS <sub>2</sub>                   | CC        | 175              | 98                                  | hydrothermal | [1]              |
| Ni-doped MoS <sub>2</sub>         | CC        | 136              | 72                                  | hydrothermal | [2]              |
| MoSe <sub>2</sub>                 | CF        | 186              | 88                                  | hydrothermal | [3]              |
| Co-Doped VSe <sub>2</sub>         | CC        | 180              | 63                                  | hydrothermal | [4]              |
| ReS <sub>2</sub>                  | CC        | 171              | 100                                 | hydrothermal | [5]              |
| MoS <sub>2</sub> /VS <sub>2</sub> | CFP       | 200              | 95.2                                | CVD          | [6]              |
| Co-doped MoSe <sub>2</sub>        | CC        | 210              | 91                                  | solvothermal | [7]              |
| Ni-doped MoSe <sub>2</sub>        | CC        | 226              | 95                                  | solvothermal |                  |
| <b>PtSe<sub>2</sub>@ CC-3</b>     | <b>CC</b> | <b>177</b>       | <b>67</b>                           | <b>CVD</b>   | <b>This work</b> |

### **The treatment of the carbon cloth substrate:**

Before Pt sputtering, the carbon cloth is treated as the following process: The carbon cloth substrates were first soaked in concentrated nitric acid (65%) at room temperature for overnight to improve their hydrophilicity as well as remove impurities from the surface of the carbon cloth. Afterwards, the carbon cloth was rinsed repeatedly with deionized water and alcohol, and then dried under vacuum at 60 °C for 6 h.

### **Theoretical calculations:**

In the adsorption structures, the slab was separated by a 2 nm vacuum space. The 1T-edge was simulated using a 2×4×4 slab model, with x direction and the vertical direction of the midline of y and z vectors being continuous while the midline direction of y and z direction separated by vacuum slabs. A 5×5×1 k-mesh was used to sample the first Brillouin zone of unit cell on 2L-PtSe<sub>2</sub>. All atoms were relaxed until the residual force for each atom is less than 0.03 eV Å<sup>-1</sup>. The hydrogen binding energy ( $E_b$ ) can be obtained from the following equation:

$$E_b = E_{total} - E_H - E_{slab}$$

Where  $E_{total}$ ,  $E_H$  and  $E_{slab}$  are the energy of H adsorbed on the slab, the energy of H atom, and the energy of the slab before H adsorption.

### **References:**

- 1 W. H. Qing, X. Z. Fei, Z. Z. Fu, H. S. Xian, M. M. Jun, Z. Z. Cheng, Z. W. Jia and L. Hong, *Nanoscale*, 2020, 12, 22541-22550.
- 2 A. P. S. Gaur, Z. B. Wei, L. Y. Hui, T. X. Hui and H. Shan, *Appl. Surf. Sci.*, 2020, 516, 146094.
- 3 L. S. Zhan, Z. W. Jie, L. X. Meng, J. P. Stephen, K. Z. Kui, Y. C. Hai, G. Cao and W. John, *Chem. Eng. J.*, 2019, 359, 1419-1426.
- 4 Z. Qing, S. M. Meng, Y. S. Hearn, W. X. Na, T. Zhe, C. Bin, C. Hua, L. Z. Guang, C. Daniel and H. Pan, *ACS Appl. Energy Mater.*, 2019, 2, 644-653.
- 5 Q. Q. Pang, Z. L. Niu, S. S. Yi, S. Zhang, Z. Y. Liu and X. Z. Yue, *Small*, 2020, 16, 2003007.
- 6 Y. S. Hearn, T. Zhe, S. Y. Fan, D. H. Wen, W. H. Yu, Y. J. Xin, P. Hui and C. D. H.

C., *ACS Appl. Energy Mater.*, 2019, 2, 5799-5808.  
7 M. B. Guang, S. P. Ping, J. Yan, M. Tao, G. D. Lei, Q. J. Wen and C. M. Hua,  
*Angew. Chem. Int. Ed.*, 2020, 59, 15232-15237.
